# Supplementary material for: Identification of miRNAs and their target genes associated with improved maize seed vigor induced by gibberellin
Source: Front Plant Sci. 2022 Sep 13;13:1008872. doi: 10.3389/fpls.2022.1008872 (PMC9514094; doi:10.3389/fpls.2022.1008872)
Supplement: Supplementary file 3 [file Table_1.xlsx]

## Sheet: 1
Supplemental table 1 Information of each sample
Sample Name	Sample Source	Biological Replicates	Remarks
E_6h1	Group1	yes	6h after imbibition of Yu82
E_6h2	Group1	yes	6h after imbibition of Yu82
E_6h3	Group1	yes	6h after imbibition of Yu82
S_6h1	Group2	yes	6h after imbibition of Yu537A
S_6h2	Group2	yes	6h after imbibition of Yu537A
S_6h3	Group2	yes	6h after imbibition of Yu537A
E_53h1	Group3	yes	53h after imbibition of Yu82
E_53h2	Group3	yes	53h after imbibition of Yu82
E_53h3	Group3	yes	53h after imbibition of Yu82
S_53h1	Group4	yes	53h after imbibition of Yu537A
S_53h2	Group4	yes	53h after imbibition of Yu537A
S_53h3	Group4	yes	53h after imbibition of Yu537A
SGA_53h1	Group5	yes	53h after imbibition under GA3 treatment of Yu537A
SGA_53h2	Group5	yes	53h after imbibition under GA3 treatment of Yu537A
SGA_53h3	Group5	yes	53h after imbibition under GA3 treatment of Yu537A
S_78h1	Group6	yes	72h after imbibition of Yu537A
S_78h2	Group6	yes	72h after imbibition of Yu537A
S_78h3	Group6	yes	72h after imbibition of Yu537A

## Sheet: 2
Supplemental table 2 Phenotypic statistics of Yu 82 and Yu 537A at different germination stages
Name of corn material	Types	Number of seeds at different germination stages
		0	6	16	38	53	72
Yu82	Number of germinated seeds	0	0	0	3	17	18
	Fresh weight (g)	0.25	0.4	0.41	0.41	0.45	0.48
Yu537A	Number of germinated seeds	0	0	0	0	1	12
	Fresh weight (g)	0.33	0.52	0.53	0.55	0.55	0.56

## Sheet: 3
Supplemental table 3 miRNA members in each miRNA family
AC	ID	MI
MIPF0000004	MIR166	ath-miR165a-3p_R-1_1ss15AT,osa-miR166m_1ss21TA,osa-miR166m_R-2_1ss19CT,osa-miR166a-3p_1ss21CT,osa-miR166a-3p_R+1,zma-miR166a-5p,zma-miR166a-3p,zma-miR166c-5p,zma-miR166b-5p,mtr-miR166a_1ss1TG,zma-miR166j-3p,zma-miR166l-3p,zma-miR166m-5p,aly-MIR166a-p5_2ss13CG20AC,ssp-miR166_R+1,ata-miR166c-3p_R+1	16
MIPF0000008	MIR156	zma-miR156a-5p,zma-miR156d-3p_L+1,zma-miR156e-3p_L+1_2ss14CA22TC,zma-miR156a-3p,zma-miR156h-3p,zma-miR156i-3p_L+1,zma-miR156k-5p_L+1,zma-miR156k-3p_L+1,mtr-miR156e,zma-miR156l-3p_L+1,bdi-miR156b-5p_R+1,ata-miR156b-3p_1ss6TC	12
MIPF0000010	MIR159	ath-miR159b-3p,zma-miR159a-5p_R-1,zma-miR159a-3p,zma-MIR159c-p5,zma-miR159c-3p_L-1R-1,zma-MIR159d-p5,zma-MIR319a-p5,zma-miR319a-3p_R+1,zma-MIR319c-p5,zma-MIR319b-p5,zma-MIR319d-p5,mtr-miR159a_1ss21AT,mtr-miR159a,mtr-miR159a_1ss21AC,zma-MIR159f-p5,zma-MIR159h-p3,zma-MIR159i-p3,aly-miR159b-3p_R+1,lus-miR159b_R+1_1ss21CT,cpa-miR159a_R+1	20
MIPF0000012	MIR169_1	ath-miR169h_2ss14CG15TC,osa-miR169h_R+2,sbi-miR169i_L+1R-1,zma-miR169f-5p_R-2,zma-miR169i-3p_L+1R+1_1,zma-miR169i-5p,zma-miR169i-3p_L+1R+1_2,zma-miR169i-3p_R+1_1ss6TC,zma-miR169o-5p_R-1,zma-miR169o-3p_L+1,zma-miR169p-5p_R-2,bdi-MIR169d-p3_1ss1AC,ppe-MIR169i-p5_2ss1CT19GT	13
MIPF0000015	MIR399	lus-MIR399f-p3_2ss15AG20TG_1,lus-MIR399f-p5_2ss15AG20TG,lus-MIR399f-p3_2ss15AG20TG_2	3
MIPF0000023	MIR167_1	osa-miR167d-5p_L+1R+1_1,osa-miR167d-5p_L+1R+1_2,zma-miR167a-5p,zma-miR167b-3p_L-1,zma-miR167e-5p,zma-miR167e-3p,zma-miR167e-5p_R+1,zma-miR167h-3p_L+1R+1,ptc-miR167a_R+1,zma-MIR167j-p3_2ss12AT20TA,mtr-miR167b-5p_1ss21GT,mdm-miR167h_R-1_1ss19CT	12
MIPF0000030	MIR171_1	osa-MIR171a-p5,osa-MIR171a-p3,osa-miR171b,zma-miR171d-5p,zma-miR171d-3p,zma-MIR171f-p3,zma-MIR171j-p3,zma-MIR171i-p3,mtr-miR171c_R+1,mtr-miR171c_2ss9CT21TC,bdi-MIR171a-p3,zma-MIR171l-p3,zma-MIR171m-p3,mdm-miR171a	14
MIPF0000032	MIR160	zma-miR160a-5p,zma-miR160b-3p,zma-miR160f-5p_R-2,ppt-miR160a_L+1,htu-miR160a_R+1,htu-miR160a_R+1_1ss20CT	6
MIPF0000035	MIR172	zma-miR172a_R+1,zma-miR172e,tcc-miR172d	3
MIPF0000037	MIR169_2	zma-miR169a-5p,zma-miR169a-3p_R-1,zma-miR169c-5p,zma-miR169c-3p_R-1,bdi-MIR169a-p5_2ss8TC17TC,bdi-MIR169c-p3_2ss14TC18GC,gma-MIR169j-p5,lus-MIR169f-p5_2ss12AT17TG,lus-MIR169f-p3_2ss12AT17TG	9
MIPF0000045	MIR164	zma-miR164a-5p,zma-miR164b-3p_L+2,zma-MIR164c-p3,zma-miR164e-5p,zma-MIR164e-p3,zma-miR164f-5p_R-1	6
MIPF0000047	MIR396	zma-miR396a-5p,zma-miR396a-3p,osa-miR396e-5p_L+1,zma-miR396c_L-1,zma-miR396e-5p_R-1,zma-miR396g-5p_1ss2CT,gma-miR396a-5p_1ss21GA	7
MIPF0000081	MIR168	zma-miR168a-5p,zma-miR168a-3p_L+3R+1,zma-miR168b-3p_R+1,aly-miR168a-5p	4
MIPF0000083	MIR393	zma-miR393a-5p_R-1,zma-miR393a-3p_L-1,zma-miR393b-5p_R-1,zma-miR393b-3p_L-1,zma-miR393c-3p_L-1	5
MIPF0000100	MIR394	zma-miR394a-5p,gma-miR394a-5p_L+2	2
MIPF0000101	MIR390	zma-miR390a-5p,zma-miR390a-3p_R-1	2
MIPF0000102	MIR408	zma-MIR408a-p5,zma-miR408a_L-1,ppt-miR408b_R+1_2ss19GT20CT,zma-miR408b-5p_L+1,gma-miR408a-3p_L-1R+3,mtr-miR408-3p_L-1R+2,mdm-miR408a_L-1R+3	7
MIPF0000104	MIR171_2	zma-miR171h-3p_L-1R+1	1
MIPF0000107	MIR398	mtr-miR398b	1
MIPF0000120	MIR397	osa-MIR397a-p3_2ss11CG18TA,zma-MIR397b-p5,zma-MIR397b-p3,mtr-miR397-5p	4
MIPF0000125	MIR167_2	zma-miR167e-5p_R+1,zma-miR167g-3p_L+1	2
MIPF0000169	MIR162_2	zma-miR162-3p_R+1	1
MIPF0000216	MIR477	ppt-MIR477e-p5_2ss8GT17AT	1
MIPF0000323	MIR169_4	zma-MIR169e-p3_2ss5CT17TC	1
MIPF0000375	MIR414	ath-MIR414-p3_2ss13AG17TC,ath-MIR414-p3_2ss10TC21AC	2
MIPF0000382	MIR1122	tae-MIR1122a-p5_2ss19AG21AC	1
MIPF0000388	MIR529	zma-miR529-5p,zma-miR529-3p	2
MIPF0000402	MIR444	osa-miR444b.1_L+1,osa-MIR444d-p5,osa-miR444d.3_1ss21GT,osa-miR444d.3_L-2,osa-miR444d.3_R-1_1ss18GT,osa-MIR444e-p5,osa-MIR444e-p3,osa-miR444a-3p.2_R+1_1ss9CT,osa-miR444a-3p.2,osa-miR444f,bdi-miR444a_L-1R+1_1ss4CT,ssp-MIR444b-p3,zma-miR444a,zma-MIR444a-p5_1,zma-MIR444a-p5_2,zma-miR444a_L+1,zma-MIR444b-p5,zma-miR444a_L-3,zma-miR444a_R-2_2ss18GT19CT,bdi-MIR444d-p5_1ss2GA	20
MIPF0000403	MIR482	gma-miR482b-3p	1
MIPF0000650	MIR1858	osa-MIR1858b-p3_2ss1TC17GC	1
MIPF0000726	MIR827	zma-miR827-5p_L+1,zma-miR827-3p	2
MIPF0000745	MIR2118	osa-MIR2118e-p3_2ss10CA18GT,osa-MIR2118e-p3_2ss13TA19CT,zma-miR2118b,zma-miR2118d	4
MIPF0000754	MIR2111	ptc-MIR2111b-p3_2ss1GT18CT	1
MIPF0000815	MIR2592	mtr-MIR2592ay-p5_2ss6AG17CG,mtr-MIR2592bj-p3_2ss12TC19AT	2
MIPF0000832	MIR169_5	zma-miR169m-3p_L+1	1
MIPF0000868	MIR528	zma-miR528a-5p,zma-miR528a-3p_L+1,bdi-MIR528-p5,bdi-MIR528-p3_1ss21GT	4
MIPF0000871	MIR398_2	zma-miR398a-3p,zma-miR398b-5p	2
MIPF0000882	MIR396_2	osa-miR396d	1
MIPF0001104	MIR319	mtr-miR319a-3p_R+1	1
MIPF0001138	MIR858	ath-miR858a_L-1R+1_1ss21TC,ath-miR858b_1ss20TC	2
MIPF0001377	MIR5568	sbi-miR5568b-5p_L-1R+1	1
MIPF0001432	MIR5303	stu-MIR5303j-p5_2ss10GT17CT	1
MIPF0001542	MIR3630	han-miR3630-3p_L-1_1ss2GA	1
MIPF0001677	MIR8005	stu-MIR8005c-p5_1ss14AG	1
MIPF0001917	MIR9674	ata-miR9674a-5p	1

## Sheet: 4
Supplemental Table 4 Targets analysis for miRNAs
Index	miRNA_name	Predicted targets transcript	Target Transcript Famile	Degradome_Detected	Degradome_Detected(Target Transcript Famile)
1	PC-3p-100007_10	44	39	0	0
2	PC-3p-100169_10	12	8	0	0
3	PC-3p-100387_10	25	10	0	0
4	PC-3p-101273_10	62	46	0	0
5	PC-3p-101948_10	25	24	0	0
6	PC-3p-101954_10	85	63	5	2
7	PC-3p-102235_10	8	5	0	0
8	PC-3p-102417_10	63	59	1	1
9	PC-3p-103369_10	5	5	0	0
10	PC-3p-11302_318	3	3	0	0
11	PC-3p-11342_316	1	1	0	0
12	PC-3p-119634_8	57	46	0	0
13	PC-3p-12036_297	96	86	9	8
14	PC-3p-12284_291	42	30	3	2
15	PC-3p-123230_8	19	17	0	0
16	PC-3p-14716_239	71	70	0	0
17	PC-3p-15328_228	10	8	0	0
18	PC-3p-18251_188	89	77	0	0
19	PC-3p-19475_175	100	79	16	8
20	PC-3p-20006_169	1	1	0	0
21	PC-3p-20208_167	7	4	0	0
22	PC-3p-20512_164	6	4	0	0
23	PC-3p-20629_163	13	12	0	0
24	PC-3p-20816_161	136	118	0	0
25	PC-3p-20825_161	51	49	0	0
26	PC-3p-21234_158	4	4	0	0
27	PC-3p-21310_157	15	11	0	0
28	PC-3p-21405_156	55	54	0	0
29	PC-3p-22095_151	89	86	0	0
30	PC-3p-22983_143	8	6	0	0
31	PC-3p-23456_139	9	7	0	0
32	PC-3p-24127_135	35	31	5	4
33	PC-3p-24133_135	8	5	0	0
34	PC-3p-28314_109	24	23	0	0
35	PC-3p-28590_108	25	23	0	0
36	PC-3p-28610_108	2	2	0	0
37	PC-3p-29564_103	184	157	0	0
38	PC-3p-29623_103	245	225	1	1
39	PC-3p-29983_101	1	1	0	0
40	PC-3p-30192_100	25	24	0	0
41	PC-3p-30304_99	12	8	0	0
42	PC-3p-30668_98	89	83	0	0
43	PC-3p-30970_96	3	1	0	0
44	PC-3p-31589_94	39	36	0	0
45	PC-3p-32131_91	2	2	0	0
46	PC-3p-32695_89	16	16	0	0
47	PC-3p-33280_87	68	65	13	12
48	PC-3p-34637_82	41	31	0	0
49	PC-3p-36527_76	45	44	3	2
50	PC-3p-38915_69	1	1	0	0
51	PC-3p-40792_64	7	7	0	0
52	PC-3p-40879_64	1	1	0	0
53	PC-3p-41281_63	6	5	0	0
54	PC-3p-41436_62	16	12	16	12
55	PC-3p-42125_61	74	54	0	0
56	PC-3p-42874_59	7	7	0	0
57	PC-3p-43062_59	56	47	4	4
58	PC-3p-43084_58	2	2	0	0
59	PC-3p-43855_57	23	22	0	0
60	PC-3p-45380_54	44	40	6	5
61	PC-3p-46255_52	99	77	0	0
62	PC-3p-48956_47	8	5	0	0
63	PC-3p-49222_46	1	1	0	0
64	PC-3p-49797_46	314	290	8	4
65	PC-3p-49903_45	8	6	0	0
66	PC-3p-51052_44	11	7	0	0
67	PC-3p-51149_43	5	5	0	0
68	PC-3p-52378_42	48	47	0	0
69	PC-3p-52994_41	34	30	0	0
70	PC-3p-53041_41	86	84	0	0
71	PC-3p-53540_40	159	129	3	2
72	PC-3p-53575_40	17	11	6	2
73	PC-3p-54450_39	9	7	0	0
74	PC-3p-54472_39	95	65	5	5
75	PC-3p-55318_38	12	11	0	0
76	PC-3p-55652_37	6	3	0	0
77	PC-3p-56097_37	4	4	0	0
78	PC-3p-56967_35	1	1	0	0
79	PC-3p-58595_34	16	15	0	0
80	PC-3p-62460_30	68	65	0	0
81	PC-3p-62830_29	23	16	0	0
82	PC-3p-63184_29	60	49	6	4
83	PC-3p-63738_28	7	6	0	0
84	PC-3p-64031_28	32	28	0	0
85	PC-3p-65010_27	82	65	2	2
86	PC-3p-65052_27	17	15	0	0
87	PC-3p-65480_27	30	19	0	0
88	PC-3p-68356_24	45	35	0	0
89	PC-3p-6867_520	169	150	6	5
90	PC-3p-6907_517	24	24	0	0
91	PC-3p-69117_24	19	13	0	0
92	PC-3p-69499_24	65	61	0	0
93	PC-3p-71069_22	5	5	0	0
94	PC-3p-71525_22	182	137	0	0
95	PC-3p-71945_22	61	53	0	0
96	PC-3p-72388_22	89	75	7	7
97	PC-3p-74207_20	9	7	0	0
98	PC-3p-74367_20	5	5	0	0
99	PC-3p-74822_20	57	42	0	0
100	PC-3p-76142_20	1	1	0	0
101	PC-3p-76827_19	91	79	4	2
102	PC-3p-77427_19	21	20	0	0
103	PC-3p-77617_19	1	1	0	0
104	PC-3p-77830_19	3	3	0	0
105	PC-3p-77872_19	4	4	0	0
106	PC-3p-78099_19	70	54	0	0
107	PC-3p-78555_18	27	25	4	4
108	PC-3p-79072_18	2	1	0	0
109	PC-3p-79129_18	9	9	4	4
110	PC-3p-79348_18	3	2	0	0
111	PC-3p-79933_18	48	43	0	0
112	PC-3p-80800_17	5	5	0	0
113	PC-3p-80808_17	1	1	0	0
114	PC-3p-81605_17	1	1	0	0
115	PC-3p-82850_17	19	14	0	0
116	PC-3p-83610_16	53	48	3	2
117	PC-3p-84139_16	6	3	0	0
118	PC-3p-84581_16	53	43	0	0
119	PC-3p-84803_16	39	35	1	1
120	PC-3p-84914_16	7	6	0	0
121	PC-3p-85224_16	108	102	4	4
122	PC-3p-85307_15	18	17	1	1
123	PC-3p-86251_15	21	21	0	0
124	PC-3p-87160_14	23	16	0	0
125	PC-3p-87232_14	4	4	0	0
126	PC-3p-87424_14	127	89	0	0
127	PC-3p-87692_14	28	21	0	0
128	PC-3p-89014_13	21	17	2	2
129	PC-3p-89352_13	6	4	0	0
130	PC-3p-91164_12	11	11	0	0
131	PC-3p-92256_12	98	75	18	14
132	PC-3p-93095_12	49	46	0	0
133	PC-3p-93343_12	7	3	0	0
134	PC-3p-94033_11	129	121	0	0
135	PC-3p-95841_11	6	6	0	0
136	PC-3p-96325_11	62	58	0	0
137	PC-3p-96328_11	16	14	0	0
138	PC-3p-96837_11	60	48	5	4
139	PC-3p-97706_11	5	4	0	0
140	PC-3p-98261_10	5	5	0	0
141	PC-3p-98351_10	2	2	0	0
142	PC-3p-98758_10	14	12	0	0
143	PC-3p-98875_10	21	19	0	0
144	PC-3p-99028_10	30	20	10	4
145	PC-5p-100889_10	86	76	0	0
146	PC-5p-100993_10	77	74	0	0
147	PC-5p-101476_10	6	5	0	0
148	PC-5p-101844_10	10	8	0	0
149	PC-5p-102889_10	18	16	0	0
150	PC-5p-103604_10	1	1	0	0
151	PC-5p-103786_10	10	7	0	0
152	PC-5p-103833_10	12	12	0	0
153	PC-5p-104960_9	105	89	5	1
154	PC-5p-10696_336	114	102	0	0
155	PC-5p-111562_9	33	33	0	0
156	PC-5p-112893_9	3	3	0	0
157	PC-5p-11630_308	17	17	0	0
158	PC-5p-13186_269	1	1	0	0
159	PC-5p-13694_258	12	10	0	0
160	PC-5p-15028_233	144	133	0	0
161	PC-5p-16585_210	8	6	0	0
162	PC-5p-17045_203	48	39	0	0
163	PC-5p-17259_201	18	18	0	0
164	PC-5p-18068_190	46	42	0	0
165	PC-5p-19979_170	10	8	0	0
166	PC-5p-23027_143	18	18	0	0
167	PC-5p-24920_129	61	51	0	0
168	PC-5p-26494_119	8	6	3	3
169	PC-5p-27455_114	9	9	0	0
170	PC-5p-27644_113	104	96	0	0
171	PC-5p-33367_87	3	2	0	0
172	PC-5p-34006_84	6	5	0	0
173	PC-5p-34421_83	57	45	4	3
174	PC-5p-34964_81	18	16	0	0
175	PC-5p-35189_80	65	49	0	0
176	PC-5p-35212_80	10	10	0	0
177	PC-5p-35575_79	1	1	0	0
178	PC-5p-38117_71	1	1	0	0
179	PC-5p-41873_61	46	42	0	0
180	PC-5p-42251_60	78	65	6	3
181	PC-5p-44182_56	9	9	0	0
182	PC-5p-46572_51	23	8	0	0
183	PC-5p-46964_50	72	58	0	0
184	PC-5p-47037_50	70	60	0	0
185	PC-5p-47155_50	21	16	0	0
186	PC-5p-48855_47	44	41	0	0
187	PC-5p-50197_45	77	62	5	3
188	PC-5p-50438_44	49	42	1	1
189	PC-5p-50885_44	165	146	0	0
190	PC-5p-5182_671	2	2	0	0
191	PC-5p-55317_38	20	19	0	0
192	PC-5p-57341_35	10	8	0	0
193	PC-5p-57389_35	1	1	0	0
194	PC-5p-58053_34	7	7	0	0
195	PC-5p-63479_29	66	57	0	0
196	PC-5p-63552_29	25	22	1	1
197	PC-5p-64722_28	5	2	0	0
198	PC-5p-65317_27	64	54	0	0
199	PC-5p-66080_26	10	9	0	0
200	PC-5p-66280_26	2	2	0	0
201	PC-5p-66426_26	3	2	0	0
202	PC-5p-67376_25	68	44	2	2
203	PC-5p-71854_22	4	4	0	0
204	PC-5p-72589_21	28	21	0	0
205	PC-5p-72660_21	206	172	27	26
206	PC-5p-73198_21	29	21	0	0
207	PC-5p-76251_19	47	38	20	19
208	PC-5p-76374_19	3	3	0	0
209	PC-5p-77064_19	3	2	0	0
210	PC-5p-77732_19	30	19	0	0
211	PC-5p-78143_19	68	57	1	1
212	PC-5p-78869_18	63	50	0	0
213	PC-5p-78964_18	111	88	10	9
214	PC-5p-81139_17	75	70	0	0
215	PC-5p-81188_17	1	1	0	0
216	PC-5p-81389_17	31	27	0	0
217	PC-5p-84044_16	33	31	0	0
218	PC-5p-85363_15	2	2	0	0
219	PC-5p-85688_15	15	15	0	0
220	PC-5p-85994_15	18	15	0	0
221	PC-5p-86534_14	5	4	2	2
222	PC-5p-86720_14	17	16	10	10
223	PC-5p-8760_411	37	34	0	0
224	PC-5p-87813_14	11	10	0	0
225	PC-5p-89700_13	1	1	0	0
226	PC-5p-90777_12	1	1	0	0
227	PC-5p-90785_12	7	5	0	0
228	PC-5p-90967_12	2	1	0	0
229	PC-5p-93151_12	4	3	0	0
230	PC-5p-97809_11	9	9	0	0
231	aly-MIR166a-p5_2ss13CG20AC	31	9	0	0
232	aly-miR159b-3p_R+1	23	21	12	12
233	aly-miR168a-5p	197	184	111	105
234	ata-miR156b-3p_1ss6TC	6	5	0	0
235	ata-miR166c-3p_R+1	67	65	64	62
236	ata-miR9674a-5p	27	20	0	0
237	ath-MIR414-p3_2ss10TC21AC	1041	923	143	101
238	ath-MIR414-p3_2ss13AG17TC	978	802	57	46
239	ath-miR159b-3p	84	69	12	12
240	ath-miR165a-3p_R-1_1ss15AT	118	104	100	89
241	ath-miR169h_2ss14CG15TC	84	72	44	37
242	ath-miR8175_L+1R-1	45	44	0	0
243	ath-miR8175_L-1	151	135	33	29
244	ath-miR8175_L-1R-1	391	352	37	32
245	ath-miR8175_L-2	484	425	43	40
246	ath-miR858a_L-1R+1_1ss21TC	88	78	7	7
247	ath-miR858b_1ss20TC	88	78	7	7
248	bdi-MIR169a-p5_2ss8TC17TC	5	4	0	0
249	bdi-MIR169c-p3_2ss14TC18GC	19	17	7	7
250	bdi-MIR171a-p3	31	29	9	9
251	bdi-MIR444d-p5_1ss2GA	95	57	45	28
252	bdi-MIR528-p3_1ss21GT	13	11	0	0
253	bdi-MIR528-p5	11	10	2	2
254	bdi-MIR7761-p5_2ss17CG18AG	839	690	11	2
255	bdi-MIR7761-p5_2ss1GC18CG	502	427	8	5
256	bdi-miR156b-5p_R+1	117	104	45	41
257	bdi-miR166j_1ss19CT	68	66	65	63
258	bdi-miR444a_L-1R+1_1ss4CT	151	120	16	16
259	bdi-miR5054_1ss10TA	275	244	6	6
260	cpa-miR159a_R+1	25	23	10	10
261	ghr-MIR7499-p3_2ss10GC17CG	47	32	0	0
262	gma-MIR1507c-p3_2ss11TC17AC	249	177	1	1
263	gma-MIR1507c-p3_2ss13TC19AC	3	3	0	0
264	gma-MIR1507c-p5_2ss11TC17AC	249	177	1	1
265	gma-MIR1507c-p5_2ss13TC19AT	13	12	0	0
266	gma-MIR169j-p5	61	55	30	27
267	gma-MIR4366-p3_1ss13TG	56	52	0	0
268	gma-MIR5368-p3	370	291	30	20
269	gma-MIR5368-p5	370	291	30	20
270	gma-MIR5368-p5_1ss1TC_1	30	25	0	0
271	gma-MIR5368-p5_1ss1TC_2	18	14	0	0
272	gma-MIR5675-p3_2ss8CT19AG	136	118	0	0
273	gma-MIR6300-p3_1ss13CT	251	222	13	12
274	gma-MIR6300-p3_1ss6AG	85	79	0	0
275	gma-MIR6300-p3_1ss7AG	30	29	0	0
276	gma-MIR6300-p5_1ss7AG	30	29	0	0
277	gma-miR394a-5p_L+2	7	5	0	0
278	gma-miR396a-5p_1ss21GA	138	116	61	55
279	gma-miR408a-3p_L-1R+3	11	10	6	5
280	gma-miR6300	339	306	30	30
281	gma-miR6300_R+1_1	125	116	10	10
282	gma-miR6300_R+1_2	147	133	13	13
283	gma-miR6300_R+1_3	138	121	3	3
284	gma-miR6300_R+1_4	137	124	3	3
285	gma-miR6300_R+2_1	60	50	3	3
286	gma-miR6300_R+2_2	119	107	3	3
287	gma-miR6300_R+4	6	6	0	0
288	gma-miR6300_R+5_1	4	4	3	3
289	han-miR3630-3p_L-1_1ss2GA	22	22	0	0
290	htu-miR160a_R+1	48	38	14	13
291	htu-miR160a_R+1_1ss20CT	44	36	14	13
292	lja-MIR7528-p5_2ss15AG18TC	236	203	7	4
293	lus-MIR169f-p3_2ss12AT17TG	433	358	39	33
294	lus-MIR169f-p5_2ss12AT17TG	430	358	39	33
295	lus-MIR399f-p3_2ss15AG20TG_1	110	98	0	0
296	lus-MIR399f-p3_2ss15AG20TG_2	98	89	0	0
297	lus-MIR399f-p5_2ss15AG20TG	98	89	0	0
298	lus-miR159b_R+1_1ss21CT	23	21	12	12
299	mdm-miR167h_R-1_1ss19CT	42	31	4	2
300	mdm-miR171a	33	33	23	23
301	mdm-miR408a_L-1R+3	11	10	6	5
302	mtr-MIR2592ay-p5_2ss6AG17CG	109	50	0	0
303	mtr-MIR2592bj-p3_2ss12TC19AT	192	157	2	2
304	mtr-MIR2603-p3_2ss9AC17AC	386	295	19	16
305	mtr-miR156e	100	86	15	15
306	mtr-miR159a	43	38	10	10
307	mtr-miR159a_1ss21AC	112	71	9	9
308	mtr-miR159a_1ss21AT	84	69	12	12
309	mtr-miR166a_1ss1TG	69	67	64	62
310	mtr-miR167b-5p_1ss21GT	41	39	27	27
311	mtr-miR171c_2ss9CT21TC	31	29	5	5
312	mtr-miR171c_R+1	12	12	5	5
313	mtr-miR319a-3p_R+1	31	31	19	19
314	mtr-miR397-5p	32	26	6	6
315	mtr-miR398b	21	18	3	3
316	mtr-miR408-3p_L-1R+2	28	27	6	5
317	osa-MIR169p-p3	182	165	10	10
318	osa-MIR169p-p5_1ss15AG	11	11	0	0
319	osa-MIR171a-p3	31	29	9	9
320	osa-MIR171a-p5	1	1	0	0
321	osa-MIR1858b-p3_2ss1TC17GC	210	172	17	11
322	osa-MIR2118e-p3_2ss10CA18GT	59	48	0	0
323	osa-MIR2118e-p3_2ss13TA19CT	332	221	7	3
324	osa-MIR2872-p3_2ss10TA22AC	2	2	0	0
325	osa-MIR397a-p3_2ss11CG18TA	228	195	6	4
326	osa-MIR444d-p5	274	232	51	45
327	osa-MIR444e-p3	76	53	3	3
328	osa-MIR444e-p5	76	53	3	3
329	osa-MIR5083-p3	434	340	6	3
330	osa-MIR5083-p5_1	2	2	0	0
331	osa-MIR5083-p5_1ss19GC	151	115	2	2
332	osa-MIR5083-p5_2	434	340	6	3
333	osa-MIR5083-p5_3	273	230	25	14
334	osa-MIR6253-p3_2ss17TG18AT	1573	1306	178	144
335	osa-MIR6253-p3_2ss18TG19AT	569	479	43	22
336	osa-miR166a-3p_1ss21CT	85	76	75	67
337	osa-miR166a-3p_R+1	49	46	41	40
338	osa-miR166m_1ss21TA	84	75	74	66
339	osa-miR166m_R-2_1ss19CT	176	151	119	108
340	osa-miR167d-5p_L+1R+1_1	14	10	0	0
341	osa-miR167d-5p_L+1R+1_2	12	8	0	0
342	osa-miR169h_R+2	8	5	6	3
343	osa-miR171b	15	15	5	5
344	osa-miR396d	128	114	61	55
345	osa-miR396e-5p_L+1	56	51	25	23
346	osa-miR444a-3p.2	58	40	15	15
347	osa-miR444a-3p.2_R+1_1ss9CT	41	24	15	13
348	osa-miR444b.1_L+1	24	18	6	6
349	osa-miR444d.3_1ss21GT	103	92	10	10
350	osa-miR444d.3_L-2	486	433	26	17
351	osa-miR444d.3_R-1_1ss18GT	276	239	23	21
352	osa-miR444f	89	64	15	13
353	osa-miR5072_L-4	202	151	17	16
354	osa-miR5082_R-1_1ss1TC	5	2	0	0
355	osa-miR5083_L+3	3	3	0	0
356	peu-MIR2916-p3_1ss3AG	29	16	0	0
357	peu-MIR2916-p3_2ss5AG22AT	19	7	0	0
358	peu-MIR2916-p5_1ss5AG	19	7	0	0
359	peu-MIR2916-p5_2ss5AG18CT	311	209	18	14
360	peu-miR2916_L-2R-3_1ss6AG	255	208	13	12
361	ppe-MIR169i-p5_2ss1CT19GT	5176	4401	998	831
362	ppt-MIR477e-p5_2ss8GT17AT	529	422	55	41
363	ppt-miR160a_L+1	17	16	11	11
364	ppt-miR408b_R+1_2ss19GT20CT	11	10	3	3
365	ppt-miR894_L-3R+1	173	148	16	14
366	ptc-MIR2111b-p3_2ss1GT18CT	364	300	54	40
367	ptc-MIR6424-p3_1ss2GC	40	33	6	4
368	ptc-MIR6430-p3_2ss4TA17GC	298	245	0	0
369	ptc-miR167a_R+1	75	72	42	42
370	ptc-miR6478_1ss21GA	2	2	0	0
371	ptc-miR6478_R-1	5	5	0	0
372	ptc-miR6478_R-2	49	45	0	0
373	ptc-miR6478_R-2_1ss10GA	62	52	5	3
374	rgl-miR5139_L+1R+2	9	9	0	0
375	sbi-miR169i_L+1R-1	40	36	14	13
376	sbi-miR5568b-5p_L-1R+1	238	234	0	0
377	smo-MIR1103-p3_1ss10CT_1	229	194	30	24
378	smo-MIR1103-p3_1ss10CT_2	129	106	28	22
379	smo-MIR1103-p3_1ss11CT_1	336	268	45	32
380	smo-MIR1103-p3_1ss11CT_2	53	42	20	12
381	smo-MIR1103-p3_1ss12CT	85	57	2	2
382	smo-MIR1103-p3_1ss13CT_1	178	154	6	4
383	smo-MIR1103-p3_1ss13CT_2	9	9	0	0
384	smo-MIR1103-p3_1ss9CT	260	225	42	34
385	smo-MIR1103-p3_2ss11CT21AT	34	28	14	10
386	smo-MIR1103-p3_2ss8CT18AT	189	152	16	12
387	smo-MIR1103-p3_2ss9CT19AT	170	147	30	24
388	ssp-MIR444b-p3	34	21	0	0
389	ssp-miR166_R+1	67	65	64	62
390	stu-MIR5303j-p5_2ss10GT17CT	576	483	104	96
391	stu-MIR8005c-p5_1ss14AG	79	52	17	11
392	tae-MIR1122a-p5_2ss19AG21AC	235	206	8	7
393	tae-MIR1122b-p5_2ss18AG20GC	91	82	0	0
394	tae-MIR1122b-p5_2ss19AG21GC	235	206	8	7
395	tcc-miR172d	41	30	14	12
396	zma-MIR159c-p5	14	13	0	0
397	zma-MIR159d-p5	14	13	0	0
398	zma-MIR159f-p5	58	46	0	0
399	zma-MIR159h-p3	5	5	0	0
400	zma-MIR159i-p3	5	5	0	0
401	zma-MIR164c-p3	13	10	6	3
402	zma-MIR164e-p3	26	26	0	0
403	zma-MIR167j-p3_2ss12AT20TA	145	145	0	0
404	zma-MIR169e-p3_2ss5CT17TC	497	426	19	11
405	zma-MIR171f-p3	15	15	5	5
406	zma-MIR171i-p3	15	15	5	5
407	zma-MIR171j-p3	15	15	5	5
408	zma-MIR171l-p3	19	10	0	0
409	zma-MIR171m-p3	19	10	0	0
410	zma-MIR397b-p3	28	22	0	0
411	zma-MIR397b-p5	44	30	13	13
412	zma-MIR408a-p5	33	18	0	0
413	zma-MIR444a-p5_1	46	27	6	6
414	zma-MIR444a-p5_2	62	57	0	0
415	zma-MIR444b-p5	84	50	11	10
416	zma-miR156a-3p	9	8	0	0
417	zma-miR156a-5p	194	163	46	42
418	zma-miR156d-3p_L+1	4	4	0	0
419	zma-miR156e-3p_L+1_2ss14CA22TC	2	2	0	0
420	zma-miR156h-3p	29	28	22	21
421	zma-miR156k-3p_L+1	8	7	0	0
422	zma-miR156k-5p_L+1	82	69	6	6
423	zma-miR156l-3p_L+1	2	2	0	0
424	zma-miR159a-3p	78	68	18	17
425	zma-miR159a-5p_R-1	23	21	0	0
426	zma-miR159c-3p_L-1R-1	131	86	17	17
427	zma-miR160a-5p	19	18	14	13
428	zma-miR160b-3p	12	12	1	1
429	zma-miR160f-5p_R-2	115	100	17	16
430	zma-miR162-3p_R+1	140	129	27	23
431	zma-miR164a-5p	131	104	34	20
432	zma-miR164b-3p_L+2	5	5	0	0
433	zma-miR164e-5p	139	112	26	13
434	zma-miR164f-5p_R-1	223	168	54	39
435	zma-miR166a-3p	90	79	74	66
436	zma-miR166a-5p	26	23	0	0
437	zma-miR166b-5p	51	42	0	0
438	zma-miR166c-5p	101	85	0	0
439	zma-miR166j-3p	82	73	74	66
440	zma-miR166l-3p	84	75	75	67
441	zma-miR166m-5p	178	147	0	0
442	zma-miR167a-5p	97	89	48	45
443	zma-miR167b-3p_L-1	3	3	0	0
444	zma-miR167e-3p	9	9	0	0
445	zma-miR167e-5p	30	23	14	9
446	zma-miR167e-5p_R+1	15	11	4	2
447	zma-miR167g-3p_L+1	33	32	5	5
448	zma-miR167h-3p_L+1R+1	162	155	14	11
449	zma-miR168a-5p	8	5	0	0
450	zma-miR168b-3p_R+1	16	13	0	0
451	zma-miR169a-3p_R-1	112	100	10	10
452	zma-miR169a-5p	144	133	44	37
453	zma-miR169c-3p_R-1	38	29	0	0
454	zma-miR169c-5p	136	125	44	37
455	zma-miR169f-5p_R-2	226	211	54	47
456	zma-miR169i-3p_L+1R+1_1	109	99	64	58
457	zma-miR169i-3p_L+1R+1_2	147	129	64	58
458	zma-miR169i-3p_R+1_1ss6TC	494	431	131	123
459	zma-miR169i-5p	152	140	44	37
460	zma-miR169m-3p_L+1	12	11	0	0
461	zma-miR169o-3p_L+1	35	27	15	12
462	zma-miR169o-5p_R-1	84	70	32	27
463	zma-miR169p-5p_R-2	226	211	54	47
464	zma-miR171d-3p	15	15	5	5
465	zma-miR171d-5p	23	9	0	0
466	zma-miR171h-3p_L-1R+1	15	15	0	0
467	zma-miR172a_R+1	205	190	14	12
468	zma-miR172e	202	185	14	12
469	zma-miR2118b	2	2	0	0
470	zma-miR2118d	19	12	0	0
471	zma-miR319a-3p_R+1	27	27	19	19
472	zma-miR390a-3p_R-1	33	25	0	0
473	zma-miR390a-5p	49	34	0	0
474	zma-miR393a-3p_L-1	10	8	0	0
475	zma-miR393a-5p_R-1	44	41	39	36
476	zma-miR393b-3p_L-1	1	1	0	0
477	zma-miR393b-5p_R-1	44	41	39	36
478	zma-miR393c-3p_L-1	10	8	0	0
479	zma-miR394a-5p	39	32	15	8
480	zma-miR396a-3p	8	8	0	0
481	zma-miR396a-5p	186	158	71	60
482	zma-miR396c_L-1	81	74	51	45
483	zma-miR396e-5p_R-1	322	280	100	89
484	zma-miR396g-5p_1ss2CT	72	66	41	36
485	zma-miR397a-5p	15	15	0	0
486	zma-miR398a-3p	35	26	11	11
487	zma-miR398b-5p	9	8	0	0
488	zma-miR408a_L-1	186	165	45	37
489	zma-miR408b-5p_L+1	27	14	0	0
490	zma-miR444a	68	45	18	15
491	zma-miR444a_L+1	41	23	4	4
492	zma-miR444a_L-3	983	847	58	37
493	zma-miR444a_R-2_2ss18GT19CT	269	205	36	26
494	zma-miR528a-3p_L+1	19	18	5	5
495	zma-miR528a-5p	56	43	20	13
496	zma-miR529-3p	116	104	0	0
497	zma-miR529-5p	108	101	4	4
498	zma-miR827-3p	48	39	17	12
499	zma-miR827-5p_L+1	3	3	0	0
		47145	39754	6196	5254
